# Supplementary material for: Synthesis of bifunctional Au–Sn organic–inorganic catalysts for acid-free hydroamination reactions
Source: Royal Society of Chemistry journal article supplement (doi:10.1039/b810310k), 2008-01-01
Supplement: b810310k.pdf [file b810310k.pdf]

## SUPPLEMENTARY MATERIAL

### General Remarks

All preparations of metal complexes were carried out under dinitrogen by conventional Schlenk-tube techniques. Solvents were carefully degassed before use. The silylating agent  $\text{OCN}(\text{CH}_2)\text{Si}(\text{OEt}_3)$  was obtained from ABCR. C, H and N analysis were carried out by the analytical department of the Instituto de Química Orgánica (C.S.I.C.) with a LECCO apparatus. Metal contents were analysed by atomic absorption using a Perkin Elmer AAnalyst 300 atomic absorption apparatus and plasma ICP Perkin Elmer 40. IR spectra were recorded on a Bruker IFS 66v/S spectrophotometer (range  $4000\text{--}200\text{ cm}^{-1}$ ) in KBr pellets. Diffuse reflectance UV-Vis spectra were recorded on Shimadzu UV-2401 PC spectrophotometer.  $^1\text{H}$ -NMR,  $^{13}\text{C}$ -NMR spectra were taken on Varian XR300 and Bruker 200 spectrometers. Chemical shifts being referred to tetramethylsilane (internal standard). High resolution  $^{13}\text{C}$  MAS or CP/MAS NMR spectra of powdered samples, in some cases also with a Toss sequence, in order to eliminate the spinning side bands, were recorded at 100.63 MHz,  $6\text{ }\mu\text{s}$   $90^\circ$  pulse width, 2 ms contact time and 5-10 recycle delay, using a Bruker MSL 400 spectrometer equipped with an FT unit. The spinning frequency at the magic angle ( $54^\circ44'$ ) was 4 KHz.<sup>1</sup> Gas chromatography analysis was performed using a Hewlett-Packard 5890. 2-(support), 2Au-(support) has described previously<sup>2</sup>

### Synthesis of MCM- 41 materials

The inorganic supports for anchoring were purely siliceous MCM-41, Al-containing MCM-41 ( $\text{Si}/\text{Al} \approx 15$ ) and Sn-containing MCM-41 ( $\sim 10\text{--}12\%$  Sn). MCM-41 materials were synthesized following previous works<sup>3</sup>.

#### Synthesis of pure silica MCM-41 (MCM-41 pure silica)

Pure silica MCM-41 was synthesized from a gel having the following molar composition:  $\text{SiO}_2\text{:}0.15\text{CTABr:}0.26\text{TMAOH:}24.3\text{H}_2\text{O}$  where CTABr is cetyltrimethylammonium bromide and TMAOH is tetramethylammonium hydroxide.

In a typical procedure, 1.82 g. of CTABr was dissolved in 12.2 g of water and 3.151 g. of TMAOH (25% TMAOH in water, Aldrich) at  $40^\circ\text{C}$ . Then 2 g of  $\text{SiO}_2$  (Aerosil, Degussa 200) was added.

The resulting gel was introduced into Teflon-lined stainless steel autoclave, and was heated at  $100^\circ\text{C}$  for 48h under static conditions. The solid was recovered by filtration

and then was extensively washed with distilled water and dried in an oven at 100°C, overnight.

#### Synthesis of Al- containing MCM-41 (**MCM-41, Si/Al=15**)

Al-MCM-41 sample was synthesized from a gel having the following molar composition:  $\text{SiO}_2:0.15\text{CTABr}:0.26\text{TMAOH}:0.037\text{Al}_2\text{O}_3:24.3\text{H}_2\text{O}$ .

In a typical procedure, 1.82 g. of CTABr (Aldrich, 99%) was dissolved in 12.2 g of water and 3.151 g. of TMAOH (25% TMAOH in water, Aldrich) at 40°C. Then, 0.232 g of  $\text{Al}(\text{OH})_3$  was added, and the resulting mixture was stirred for 5 minutes. Then 2 g of  $\text{SiO}_2$  (Aerosil, Degussa 200) was added.

The resulting gel was introduced into Teflon-lined stainless steel autoclave, and was heated at 135°C for 24h under static conditions. The solid was recovered by filtration and then was extensively washed with distilled water and dried in an oven at 100°C, overnight.

#### Synthesis of Sn- containing MCM-41 (**MCM-41-Sn<sub>4</sub>**)

61.5 g. of an aqueous solution of hexadecyltrimethylammonium hydroxide ( $\text{C}_{16}\text{TMAOH}$ , 0.43M) was mixed with 15.7 g. of tetramethylammonium hydroxide solution (TMAOH 25% in water, Aldrich) and an aqueous solution of  $\text{SnCl}_4 \cdot 5\text{H}_2\text{O}$  (2.38 g. of  $\text{SnCl}_4 \cdot 5\text{H}_2\text{O}$  in 7.01 g. of  $\text{H}_2\text{O}$ ). After homogenisation, 10 g. of silica (Aerosil, Degussa) was added under continuous stirring.

The final gel composition was the following:

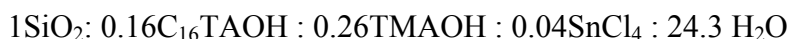

The homogeneous gel was sealed in Teflon-lined stainless steel autoclaves and heated at 135°C under static conditions during 24 hours. The resulting solid product was recovered by filtration, washed and dried at 100°C for 24 hours.

The occluded organic in as-prepared MCM-41 materials (Si-MCM-41, Al-MCM-41 and Sn-MCM-41) was removed by heating the solids at 540°C for 1 hour in a flow of  $\text{N}_2$ , followed by 6 hours in air. The final solids present a typical XRD pattern of MCM-41 structure.

Chemical composition and textural properties of inorganic supports are summarized in the following table

|                        | Si/M | BET Area<br>(m <sup>2</sup> /g) | V (cc/g) |
|------------------------|------|---------------------------------|----------|
| MCM-41                 | -    | 1064                            | 0.66     |
| Al-MCM-41              | 12   | 846                             | 0.62     |
| MCM-41-Sn <sub>s</sub> | 25   | 925                             | 0.69     |

### Synthesis of Sn grafted MCM-41 (MCM-41-Sn<sub>G</sub>)

Sn grafted MCM-41 material was prepared according to previous work<sup>4</sup> using nBuSnCl<sub>3</sub> as source of tin. The grafting procedure was carried out as follows. 1 g of extracted pure silica MCM-41(the template was extracted following a two step extraction procedure<sup>5</sup>) was out gassed at 100°C for 2 hours. Then, 10 g of a solution containing the appropriate amount of nBuSnCl<sub>3</sub> (Sn/Si=0.04) in anhydrous toluene was added under N<sub>2</sub> on the dehydrated MCM-41. After 1 hour in aging conditions at room temperature, 2g of a solution containing triethylamine (nBuSnCl<sub>3</sub>/(C<sub>2</sub>H<sub>5</sub>)<sub>3</sub>N=1, molar relation) in toluene was added under inert atmosphere at room temperature. Next, after 1 hour in aging conditions the solid was filtrated and washed with toluene. Finally, the organic material was removed by calcination at 580°C for 3 h. in air stream.

Figure S1. IR spectra of MCM-41 materials after adsorption at 673 K in vacuum and desorption at 423 K of pyridine. (B: Brönsted acid sites, L: Lewis acid sites)

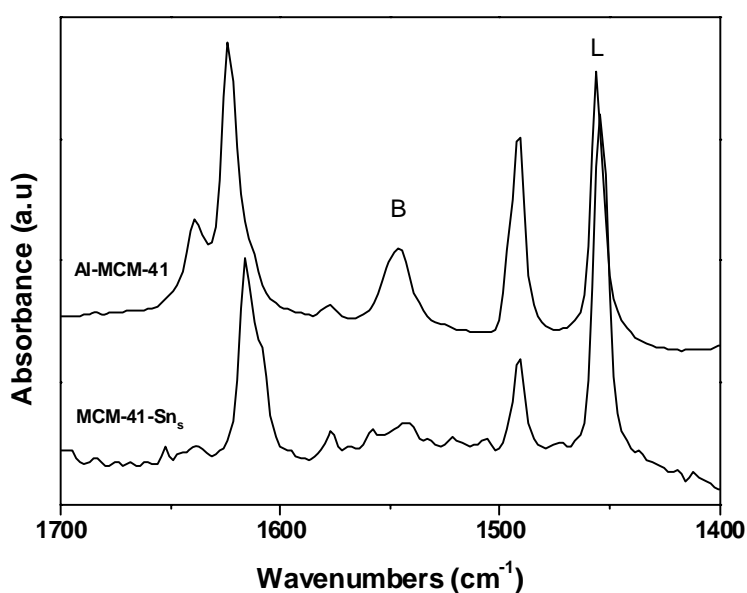

## Synthesis of Supported carbene gold(I)-complexes<sup>6</sup>,

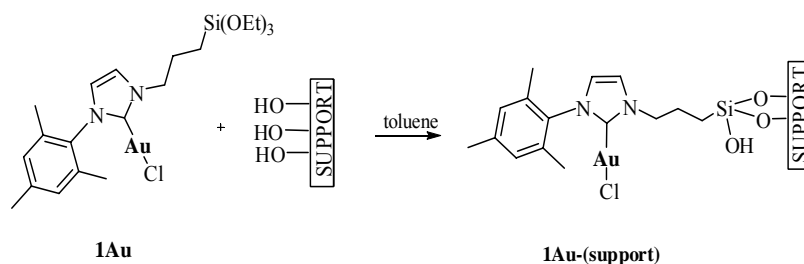

Scheme S1. Heterogenization of 1Au complex on MCM-41.

### Heterogenization of 1Au (1Au-(MCM-41) support). Scheme S1

Heterogenized complexes were synthesized following the general method: to a suspension of the support in toluene (20 ml), at room temperature, was added a dichloromethane solution of (1-(2,4,6-trimethylphenyl)-3-(3-triethoxysilyl)propyl-2,3-dihydro-1*H*-imidazol-2-yl)gold (I) chloride complex (**1Au**) (20% in weight). The resulting mixture was stirred under reflux for 12 h, cooled to room temperature and filtered. The solid was washed several times with dichloromethane, dried and filtered to afford the respective heterogenized complexes, **complex-(support)**, in almost quantitative yields. The loadings are based on the percent of metal obtained from the elemental analysis data.

**1Au-(MCM-41)**: anal. found: C: 9.1; H: 1.8; N: 0.6; Au %: 0.6; (0.21 mmol/g). <sup>13</sup>C-NMR (solid):  $\delta$  = 174.3 (C-Au); 138.5 (C<sub>arom</sub>-N); 135.1 (C<sub>arom</sub>-CH<sub>3</sub> *o*-); 129.2 (C<sub>arom</sub>); 123.0 (CH<sub>imin</sub>-N<sub>alif</sub>); 121.7 (CH<sub>imin</sub>-N<sub>arom</sub>); 65.8 (CH<sub>2</sub>O); 54.8 (CH<sub>2</sub>N); 31.0 (-CH<sub>2</sub>-); 25.5 (CH<sub>3o</sub>); 15.5 (-OCH<sub>2</sub>CH<sub>3</sub>); 13.6 (CH<sub>3p</sub>-); 8.2 (CH<sub>2</sub>Si). IR (KBr, cm<sup>-1</sup>):  $\nu$  = 1631 (C=N), 1089 (Si-O); 325 (Au-Cl). UV-vis ( $\lambda$ , nm): 210, 250, 260, 325, 410, 510.

**1Au-(MCM-41-SnG)**: anal. found: C: 5.3; H: 1.5; N: 0.6; Au: 0.7 %; (0.20 mmol/g). <sup>13</sup>C-NMR (solid):  $\delta$  = 174.1 (C-Au); 138.0 (C<sub>arom</sub>-N); 135.4 (C<sub>arom</sub>-CH<sub>3</sub> *o*-); 129.0 (C<sub>arom</sub>); 123.2 (CH<sub>imin</sub>-N<sub>alif</sub>); 121.8 (CH<sub>imin</sub>-N<sub>arom</sub>); 65.6 (CH<sub>2</sub>O); 54.5 (CH<sub>2</sub>N); 31.2 (-CH<sub>2</sub>-); 25.3 (CH<sub>3o</sub>); 15.2 (-OCH<sub>2</sub>CH<sub>3</sub>); 13.8 (CH<sub>3p</sub>-); 8.3 (CH<sub>2</sub>Si). IR (KBr, cm<sup>-1</sup>):  $\nu$  = 1631 (C=N), 1095 (Si-O); 313 (Au-Cl). UV-vis ( $\lambda$ , nm): 215, 247, 263, 323, 416, 516.

IR spectrum (Figure S2) shows the vibration of O-H groups in the range 3700-3300  $\text{cm}^{-1}$ . IR associated to zeolite framework appears at 1140, 1040, 960, 785 and 740  $\text{cm}^{-1}$ . The 1600  $\text{cm}^{-1}$  frequencies can be assigned to C=C shifted to lower wavenumbers relative to the free ligands. New bands in the  $\text{cm}^{-1}$  region at ca. 330  $\text{cm}^{-1}$  are ascribed to  $\nu(\text{Au-Cl})$ .

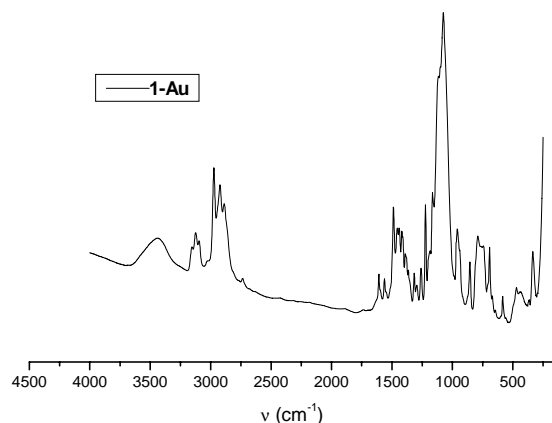

Figure S2. IR spectrum for 1Au

The complexes show several band maxima in the UV region (Fig S3, S4) with the assignment of the bands as intraligand transitions in the aromatic ring, imidazolium group and charge-transfer transition. The spectrum shows the signals attributable to the imidazolium entity and to the aliphatic and aromatic part of the ligand. The  $^{13}\text{C}$  NMR spectra give the signals assigned to the carbene carbon at  $\delta \sim 175$  downfield shifted.

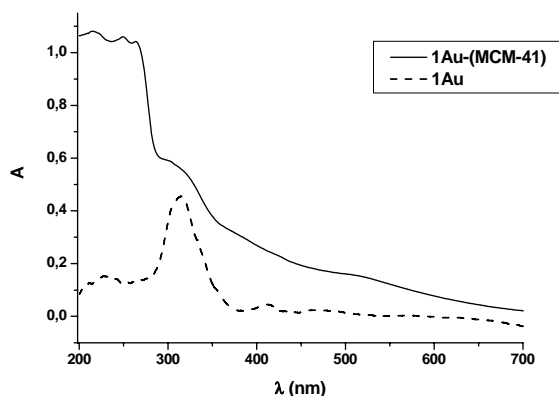

Figure S3. DFTR spectra for 1Au complexes

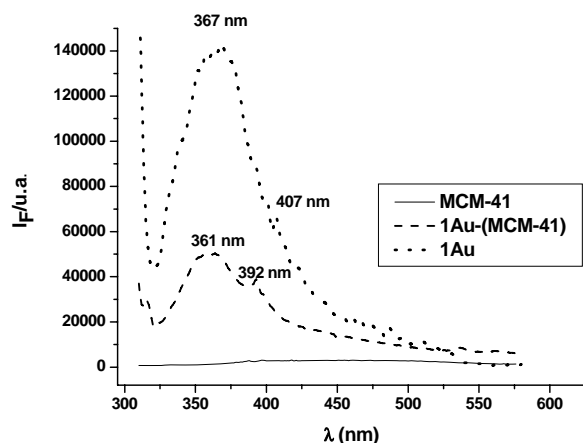

Figure S4. Emission spectra for soluble 1Au and heterogenized 1Au-(MCM-41) complexes ( $\lambda = 302$  nm)

### Synthesis of supported Schiff base gold(III)-complexes<sup>2,7</sup>

#### a) Synthesis of 2Au(III) complex on MCM-41 supports.

The heterogeneized ligands 2Au(III)-(MCM-41) were synthesised according a similar method to that described previously.<sup>2</sup>

#### b) Synthesis of 3Au(III) complex on MCM-41 supports.

##### General heterogenization of hydroxyaldehydes: Scheme S2

Typically, to a suspension of silica or the corresponding support MCM-41, MCM-41(Sn) (2 g) in toluene (25 ml), stirred at room temperature for 30 minutes, a solution of 2 mmol of the aldehyde in toluene (5 ml) and 400  $\mu$ l of water were added. The slurry was heated at 100°C for 16 h and the yellow solid was filtered off and washed successively with toluene, petroleum ether, ethanol and ether. The solid was dried under vacuum for 24 hours to afford the anchored precursors **precursor-(support)**. The loadings are based on the percent of nitrogen obtained from the elemental analysis data.

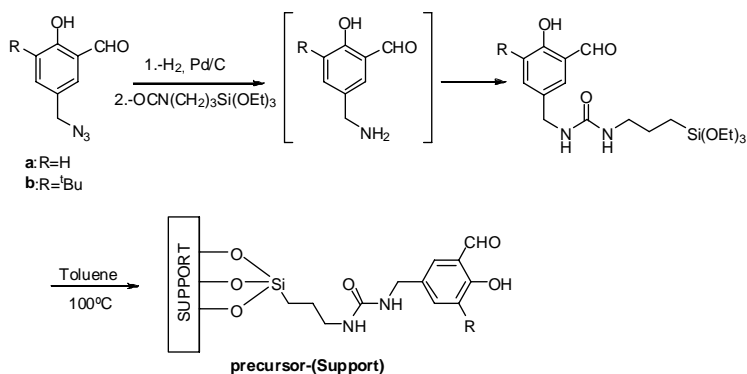

Scheme S2. Synthesis of heterogenized precursor.

**precursor-(MCM-41):** anal. found: C 13.4, H 2.8, N 1.5%; (0.55 mmol/g). IR (KBr,  $\text{cm}^{-1}$ ):  $\nu = 3421$  (NH), 1642, 1564 (CO, C=C). UV-vis ( $\lambda$ , nm): 360, 425.  $^{13}\text{C}$ -NMR (solid):  $\delta = 199.29$  (CHO); 160.58 (NHCONH); 147.84 (COH); 138.13 (C-CHNH-); 130.98 ( $\text{CH}_{\text{arom}}$ ); 120.18 (C-CHO); 57.45 ( $\text{CH}_3\text{CH}_2\text{O}-$ ); 54.29 ( $\text{NHCH}_2\text{Ph}$ ); 42.04 ( $\text{NHCH}_2\text{CH}_2-$ ); 27.60 ( $\text{C}(\text{CH}_3)_3$ ); 18.99 ( $\text{CH}_3\text{CH}_2\text{O}-$ ); 9.64 ( $\text{CH}_2\text{Si}-$ ).

**precursor-(MCM-41, Si/Al  $\approx 15$ ):** anal. found: C 36.2, H 3.3, N 1.4%; (0.47 mmol/g). IR (KBr,  $\text{cm}^{-1}$ ):  $\nu = 3407$  (NH), 1639, 1512 (CO, C=C). UV-vis ( $\lambda$ , nm): 349, 264, 223.  $^{13}\text{C}$ -NMR (solid):  $\delta = 199.00$  (CHO); 161.02 (NHCONH); 147.41 (COH); 137.83 (C-CHNH-); 131.26 ( $\text{CH}_{\text{arom}}$ ); 120.03 (C-CHO); 57.31 ( $\text{CH}_3\text{CH}_2\text{O}-$ ); 54.05 ( $\text{NHCH}_2\text{Ph}$ ); 42.00 ( $\text{NHCH}_2\text{CH}_2-$ ); 27.43 ( $\text{C}(\text{CH}_3)_3$ ); 19.12 ( $\text{CH}_3\text{CH}_2\text{O}-$ ); 9.58 ( $\text{CH}_2\text{Si}-$ ).

**precursor-(MCM-41,  $\text{Sn}_{\text{synth}}$ ):** anal. found: C 20.3, H 3.1, N 3.3%; (1.2 mmol/g). IR (KBr,  $\text{cm}^{-1}$ ):  $\nu = 3394$  (NH), 1644, 1565 (CO, C=C). UV-vis ( $\lambda$ , nm): 224, 265, 343 432.

**precursor-(MCM-41,  $\text{Sn}_{\text{graft}}$ ):** anal. found: C 17.6, H 2.6, N 2.5%; (0.9 mmol/g). IR (KBr,  $\text{cm}^{-1}$ ):  $\nu = 3428$  (NH), 1640, 1566 (CO, C=C). UV-vis ( $\lambda$ , nm): 227, 267, 347 426.  $^{13}\text{C}$ -NMR (solid):  $\delta = 198.65$  (CHO); 160.32 (NHCONH); 147.75 (COH); 138.00 (C-CHNH-); 131.04 ( $\text{CH}_{\text{arom}}$ ); 120.43 (C-CHO); 57.00 ( $\text{CH}_3\text{CH}_2\text{O}-$ ); 54.32 ( $\text{NHCH}_2\text{Ph}$ ); 41.86 ( $\text{NHCH}_2\text{CH}_2-$ ); 27.22 ( $\text{C}(\text{CH}_3)_3$ ); 19.05 ( $\text{CH}_3\text{CH}_2\text{O}-$ ); 9.21 ( $\text{CH}_2\text{Si}-$ ).

#### Synthesis of heterogenized ligands: Scheme S3

Typically, stirred slurry of 1 mmol of the corresponding anchored hydroxyaldehyde **precursor-(support)** was prepared in ethanol (10 ml) under argon at room temperature. After 10 min. 125 mg (1.1 mmol) of the amine were added and stirred for 16 hours. Then, the mixture was allowed to cool and the deep yellow solid was filtered off and washed thoroughly with ethanol and then with ether. The solid was dried under vacuum to afford the corresponding anchored ligands **ligand-(support)**.

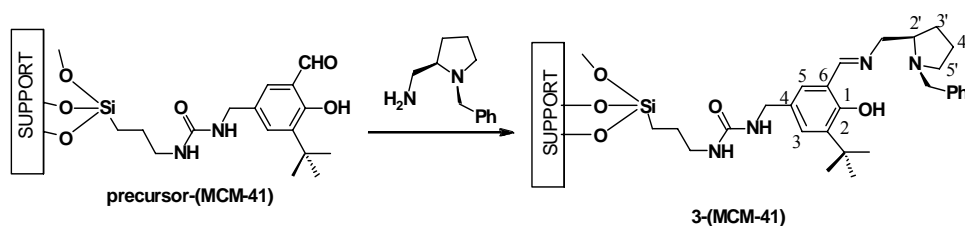

Scheme S3. Synthesis of heterogenized ligands

**3-(MCM-41)**: anal. found: C 16.3, H 3.0, N 2.5%; (0.44 mmol/g). IR (KBr,  $\text{cm}^{-1}$ ):  $\nu$  = 1630, 1557 (C=N, C=O, C=C). UV-vis ( $\lambda$ , nm): 224, 264, 347, 419.  $^{13}\text{C}$ -NMR (solid):  $\delta$  = 166.60 (CH=N); 160.53 (NHCONH); 153.62 (C-OH); 136.99 ( $C_6$ ,  $C_{\text{arom}}$ ,  $C_4$ ,  $C_2$ ) 128.74 ( $C_{\text{arom}}$ ,  $C_3$ ,  $C_5$ ); 66.50 ( $C_{2'}$ , CH=NCH<sub>2</sub>); 58.98 (CH<sub>2</sub>Ph); 53.64 ( $C_{5'}$ ); 42.48 (CH<sub>2</sub>CH<sub>2</sub>CH<sub>2</sub>Si, CCH<sub>2</sub>NH); 28.40 (C(CH<sub>3</sub>)<sub>3</sub>,  $C_{3'}$ ); 22.09 (CH<sub>2</sub>CH<sub>2</sub>Si,  $C_{4'}$ ); 8.02 (CH<sub>2</sub>Si).

**3-(MCM-41, Si/Al  $\approx$  15)**: anal. found: C 17.4, H 2.4, N 2.7%; (0.5 mmol/g). IR (KBr,  $\text{cm}^{-1}$ ):  $\nu$  = 1630 (C=N). UV-vis ( $\lambda$ , nm): 420, 337, 264, 223.

**3-(MCM-41, Sn<sub>synth</sub>)**: anal. found: C 21.4, H 3.0, N: 3.5%; (0.6 mmol/g). IR (KBr,  $\text{cm}^{-1}$ ):  $\nu$  = 1638 (C=N). UV-vis ( $\lambda$ , nm): 429, 338, 266, 228.

**3-(MCM-41, Sn<sub>graft</sub>)**: anal. found: C 19.0, H 3.1, N 3.1%; (0.5 mmol/g). IR (KBr,  $\text{cm}^{-1}$ ):  $\nu$  = 1634 (C=N). UV-vis ( $\lambda$ , nm): 431, 335, 264, 228.  $^{13}\text{C}$ -NMR (solid):  $\delta$  = 165.70 (CH=N); 160.21 (NHCONH); 154.04 (C-OH); 137.32 ( $C_6$ ,  $C_{\text{arom}}$ ,  $C_4$ ,  $C_2$ ) 128.50 ( $C_{\text{arom}}$ ,  $C_3$ ,  $C_5$ ); 66.65 ( $C_{2'}$ , CH=NCH<sub>2</sub>); 59.14 (CH<sub>2</sub>Ph); 53.75 ( $C_{5'}$ ); 42.52 (CH<sub>2</sub>CH<sub>2</sub>CH<sub>2</sub>Si, CCH<sub>2</sub>NH); 28.35 (C(CH<sub>3</sub>)<sub>3</sub>,  $C_{3'}$ ); 22.00 (CH<sub>2</sub>CH<sub>2</sub>Si,  $C_{4'}$ ); 8.00 (CH<sub>2</sub>Si).

#### Synthesis of Schiff base gold(III)-complexes. Scheme S4

The homogeneous chiral complexes were also synthesized and used as catalysts to compare the catalytic activities and to evaluate the relations between the structural features of ligands and activity. Heterogenized complexes were synthesized following the general method: to a suspension of heterogenized ligand in toluene (20 ml), at room temperature was added an ethanolic solution of HAuCl<sub>4</sub> (0.5 mmol/15 ml). The



resulting mixture was stirred under reflux for 12 h, cooled to room temperature and filtered. The solid was washed several times with ethanol, dried and filtered to afford the respective heterogenized complexes, **complex-(support)**, in almost quantitative yields.

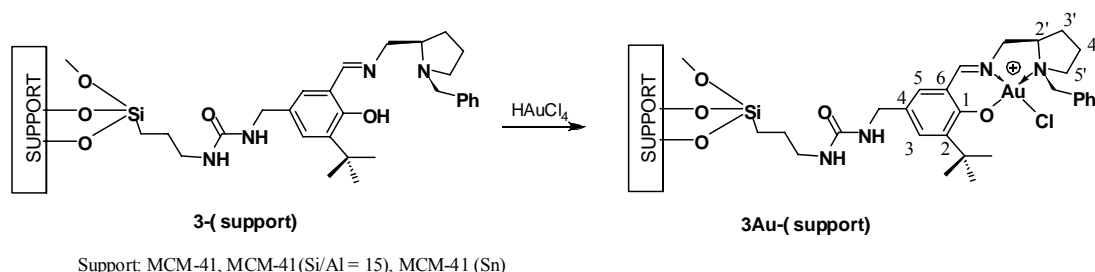

Scheme S4. Synthesis of heterogenized complexes

**3Au-(MCM-41)**: anal. found: C 15.0, H 2.0, N 2.2, Au 2.9%; (0.27 mmol/g). IR (KBr,  $\text{cm}^{-1}$ ):  $\nu = 1632\text{--}1558$  (C=N, C=O, C=C), 462 (Au-O). UV-vis ( $\lambda$ , nm): 225, 352, 410.  $^{13}\text{C}$ -NMR (solid):  $\delta = 160.07$  (NHCONH, C-O-Au); 155.30 (CH=N) 137.61 ( $\text{C}_2$ ); 128.70 ( $\text{C}_{\text{arom}}$ ,  $\text{C}_5$ ,  $\text{C}_3$ ); 120.00 ( $\text{C}_6$ ); 70.60 (CH=NCH<sub>2</sub>,  $\text{C}_2$ ); 63.21 (CH<sub>2</sub>Ph); 58.64 ( $\text{C}_5$ ); 42.97 (CH<sub>2</sub>CH<sub>2</sub>CH<sub>2</sub>Si, CCH<sub>2</sub>NH); 34.50 (C(CH<sub>3</sub>)<sub>3</sub>); 28.20 (C(CH<sub>3</sub>)<sub>3</sub>,  $\text{C}_3$ ); 23.34 ( $\text{C}_4$ , CH<sub>2</sub>CH<sub>2</sub>CH<sub>2</sub>Si); 11.23 (CH<sub>2</sub>Si).

**3Au-(MCM-41, Si/Al  $\approx$  15)**: anal. found: C 15.7, H 2.0, N 2.5, Au 4.3%; (0.4 mmol/g). IR (KBr,  $\text{cm}^{-1}$ ):  $\nu = 1630$  (CO), 1564 (C=N), 454 (Au-O). UV-vis ( $\lambda$ , nm): 229, 255, 289, 343, 408.

**3Au-(MCM-41, Sn<sub>synth</sub>)**: anal. found: C 22.7, H 2.7, N 2.7, Au 5.9%; (0.6 mmol/g). IR (KBr,  $\text{cm}^{-1}$ ):  $\nu = 1630$  (CO), 1571 (C=N), 461 (Au-O). UV-vis ( $\lambda$ , nm): 229, 271, 351, 450, 538.

**3Au-(MCM-41, Sn<sub>graft</sub>)**: anal. found: C 31.9, H 5.9, N 5.5, Au 1.3%; (0.1 mmol/g). IR (KBr,  $\text{cm}^{-1}$ ):  $\nu = 1634$  (CO), 1582 (C=N), 460 (Au-O). UV-vis ( $\lambda$ , nm): 229, 267, 357, 459, 608.

The IR spectra of supported Schiff base-gold(III) complexes show the O-H vibration in the range 3700-3300  $\text{cm}^{-1}$ . Some of the bands characteristic of the complexes could be

distinguished. Major zeolite framework bands appeared at 1140, 1040, 960, 785 and 740  $\text{cm}^{-1}$ . The 1600  $\text{cm}^{-1}$  frequencies may be assigned to C=C and azomethine C=N vibrations, shifted to lower wavenumbers (relative to the free ligands) due to N-coordination of the imine (Figure S5). The DFTR spectra show several band maxima in the UV region agreeing with the assignment of the bands as intraligand transitions in the aromatic ring, azomethine group and charge-transfer transition (Figure S6). The  $^{13}\text{C}$  NMR spectra show two set of signals which are attributable on the one hand to the substituted benzaldimine entity and on the other hand to the aliphatic part of the ligand. The  $^{13}\text{C}$  NMR spectra showed the signals assigned to the C=N carbon high field shifted and C-O at  $\delta \sim 162$  downfield shifted confirming that metallation occurred (Figure S7).

### c) Spectroscopic characterization for some complexes

Figure S5. IR spectra for heterogenized complexes

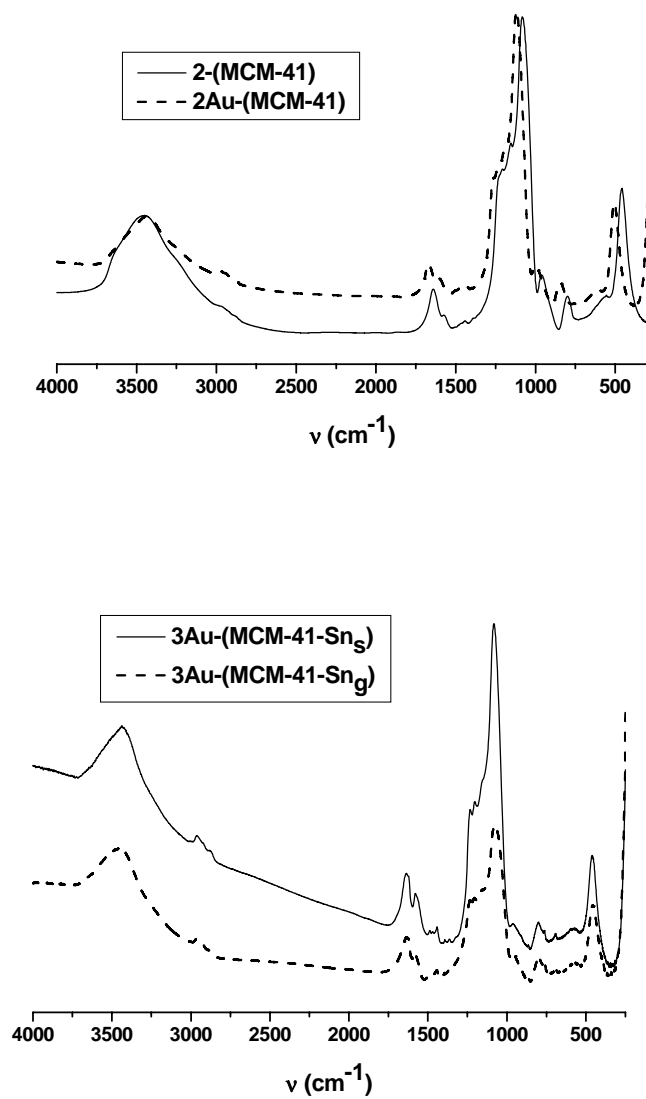

Figure S6. UV-vis spectra for heterogenized complexes.

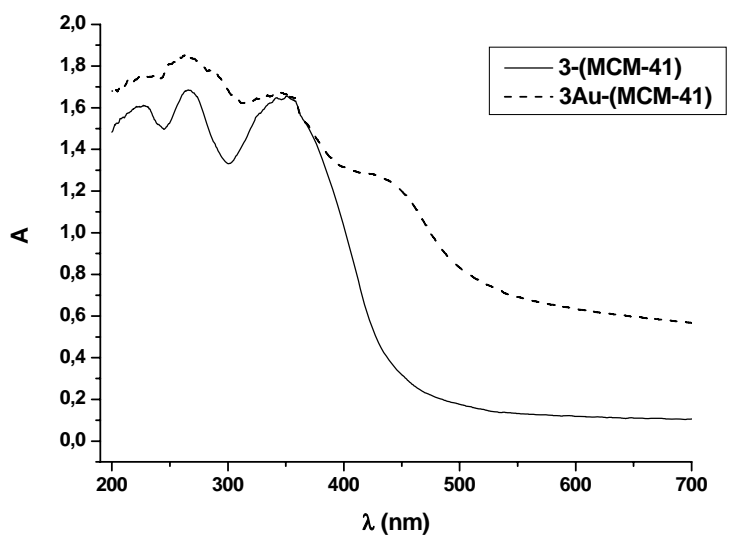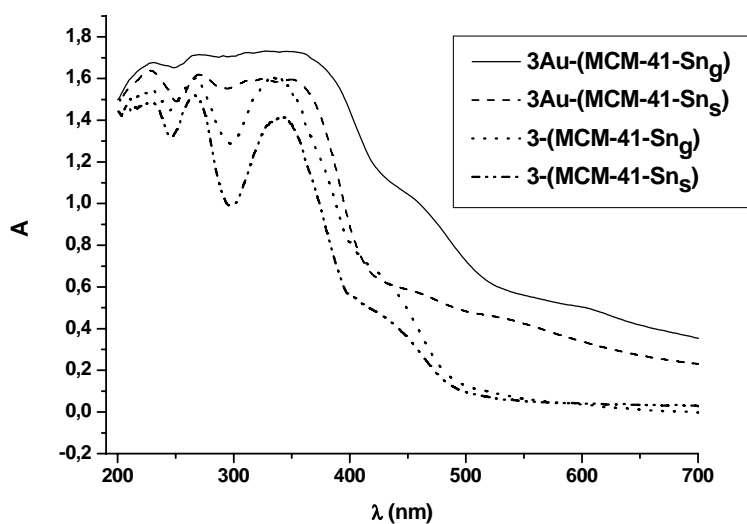

Figure S7.  $^{13}\text{C}$  NMR spectra for heterogenized complexes

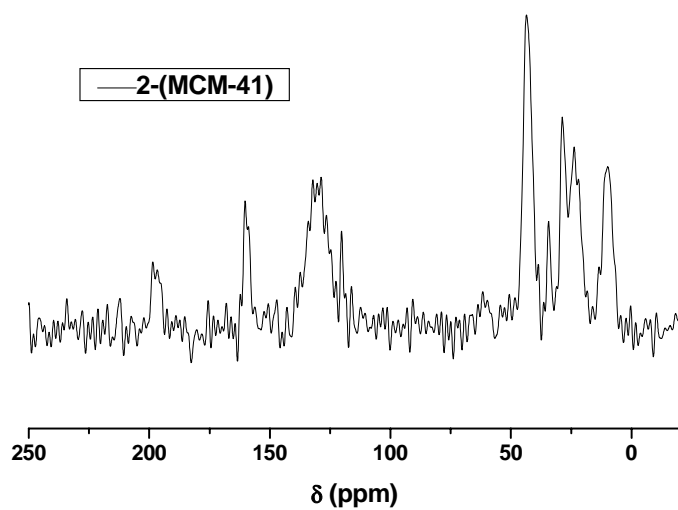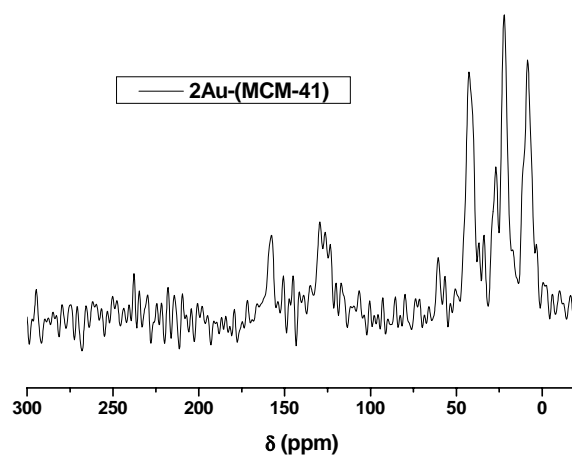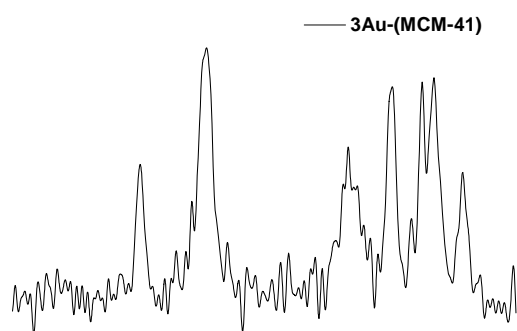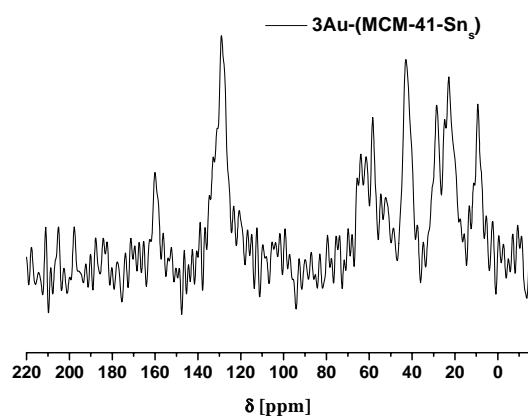

**Table 1.** Homogeneous Gold-Catalyzed Hydroamination of alkynes<sup>[a]</sup>

| Cat. | Cat.                  | R                                   | R' | R''             | t (h) | Yield. (%) <sup>[b]</sup> |
|------|-----------------------|-------------------------------------|----|-----------------|-------|---------------------------|
| 1    | 1Au(I)                | Ph                                  | H  | H               | 15    | 50                        |
| 2    | [1Au(I)] <sup>+</sup> | Ph                                  | H  | H               | 15    | 95                        |
| 3    | 2Au(III)              | Ph                                  | H  | H               | 0.3   | 100 <sup>[c]</sup>        |
| 4    | 3Au(III)              | Ph                                  | H  | H               | 1     | 100                       |
| 5    | 2Au(III)              | Ph                                  | Br | H               | 15    | 60                        |
| 6    | 2Au(III)              | Ph                                  | H  | CH <sub>3</sub> | 15    | 100                       |
| 7    | 2Au(III)              | Ph                                  | H  | OMe             | 4     | 100                       |
| 8    | 2Au(III)              | Ph                                  | H  | NO <sub>2</sub> | 15    | 100                       |
| 9    | 2Au(III)              | <i>p</i> -CH <sub>3</sub> Ph        | H  | H               | 15    | 50                        |
| 10   | 2Au(III)              | C <sub>6</sub> H <sub>13</sub>      | H  | H               | 15    | 100                       |
| 11   | 2Au(III)              | C(CH <sub>3</sub> ) <sub>2</sub> OH | H  | H               | 15    | 100                       |
| 12   | Au(0)<br>(coll.)      | Ph                                  | H  | H               | 15    | 0                         |

<sup>a</sup> Reaction conditions: 1.0 mmol of alkyne, 1.2 equiv. of amine, 5 mol% of NH<sub>4</sub>PF<sub>6</sub> and catalyst (gold(I) 10%, gold(III) 5%) in thf at 70 °C. <sup>b</sup> Determined by GC and <sup>1</sup>HNMR. <sup>c</sup> With Sn(Bu)<sub>3</sub>Cl as promoter conversion = 0%.

**Table S1.** Homogeneous Gold-Catalyzed Hydroamination of alkenes<sup>[a]</sup>

| Entry | Cat.                  | R                               | R'              | R''             | t (h) | Conv. (%) <sup>[b]</sup> |
|-------|-----------------------|---------------------------------|-----------------|-----------------|-------|--------------------------|
| 1     | 1Au(I)                | Ph                              | CH <sub>3</sub> | H               | 1     | 100                      |
| 2     | [1Au(I)] <sup>+</sup> | Ph                              | H               | H               | 0.5   | 100                      |
| 3     | 2Au(III)              | Ph                              | H               | H               | 3     | 100                      |
| 4     | 3Au(III)              | Ph                              | H               | H               | 5     | 100                      |
| 5     | 2Au(III)              | Ph                              | CH <sub>3</sub> | H               | 0.5   | 100                      |
| 6     | 2Au(III)              | (CH <sub>2</sub> ) <sub>6</sub> | H               | H               | 15    | 15                       |
| 7     | 2Au(III)              | C <sub>8</sub> H <sub>17</sub>  | H               | H               | 15    | 100                      |
| 8     | 2Au(III)              | Ph                              | H               | CH <sub>3</sub> | 15    | 100                      |
| 9     | 2Au(III)              | Ph                              | H               | NO <sub>2</sub> | 15    | 85                       |

<sup>[a]</sup> Reaction conditions: 1.0 mmol of alkyne, 1.2 equiv. of amine, 5 mol% of NH<sub>4</sub>PF<sub>6</sub> and catalyst (gold(I) 10%, gold(III) 5%) in thf at 70 °C. <sup>[b]</sup> Determined by GC and <sup>1</sup>HNMR.

<sup>1</sup> Due to the similarity of spectra for supported catalysts in each series of ligands, only completed data from some compounds were given. Data for all compounds can be obtained from authors.

<sup>2</sup> C. González-Arellano, A. Corma, M. Iglesias, F. Sánchez, *Eur. J. of Inorg. Chem.*, **2008**, 1107-1115.

<sup>3</sup> a) A. Corma, V. Fornés, M.T. Navarro, J. Pérez-Pariante, *J. Catal.*, **1994**, 148, 569-574; b) A. Corma, M.T. Navarro, L. Nemeh, M. Renz, *Chem. Commun.*, **2001**, 2190-2191.

<sup>4</sup> A. Corma, M.T. Navarro, M. Renz, *J. Catal.*, **2003**, 219, 242-246

<sup>5</sup> A. Corma, J.L. Jordá, M.T. Navarro, F. Rey, *Chem. Commun.*, **1998**, 1899-1900.

<sup>6</sup> A. Corma, E. Gutiérrez-Puebla, M. Iglesias, A. Monge, S. Pérez-Ferreras, F. Sánchez, *Adv. Synth. and Catal.* **2006**, 348, 1899-1907.

<sup>7</sup> a) C. González-Arellano, E. Gutiérrez-Puebla, M. Iglesias, F. Sánchez, *Eur. J. of Inorg. Chem.*, **2004** 1955-1962; b) C. González-Arellano, A. Corma, M. Iglesias, F. Sánchez, *Adv. Synth. and Catal.* **2004** 346 1758-1764.
